# Supplementary material for: Assessing Soil Nutrients Variability and Adequacy for the Cultivation of Maize, Cassava, and Sorghum in Selected Agroecological Zones of Cameroon
Source: Hindawi journal article supplement (doi:10.1155/2020/8887318), 2020-12-28
Supplement: f1 [file 8887318.f1.xlsx]

## Sheet: Supplementary material
			Table 1S: Soil properties and GPS points of soil samples in the Far North region
Locality	GPS location	Total Exchange Capacity (meq/100 g)	pH	Organic Matter (%)	Estimated Nitrogen Release (# N/acre)	S* (ppm)	P* (mg/kg)	Bray II P (mg/kg)	Ca* (mg/kg)	Mg* (mg/kg)	K* (mg/kg)	Na* (mg/kg)	Ca** (%)	Mg** (%)	K** (%)	Na** (%)	Other Bases** (%)	H** (%)	B* (mg/kg)	Fe* (mg/kg)	Mn* (mg/kg)	Cu* (mg/kg)	Zn* (mg/kg)	Al* (mg/kg)	K/Mg	Ca/Mg
Gazawa	N 0408173, E 1164507	28.25	8.2	1.31	46	4	2	< 1	4071	730	171	109	72.05	21.53	1.55	1.68	3.2	0	0.25	75	149	1.29	0.61	808	0.0719926	3.34649
Gazawa	N 0408162, E 1165161	18.36	8.3	1	40	4	3	< 1	2381	588	101	167	64.84	26.69	1.41	3.95	3.1	0	0.29	55	106	1.41	< 0.4	470	0.0528288	2.42937
Gazawa	N 0405817, E 1165651	8.43	6.4	0.58	23	4	27	42	1152	144	79	20	68.33	14.23	2.4	1.03	5	9	0.3	132	37	0.93	1.72	252	0.168658	4.80183
Gazawa	N 0403531, E 1163986	15.93	6.3	0.98	39	6	2	< 1	1803	426	127	127	56.59	22.28	2.04	3.47	5.1	10.5	0.26	86	46	1.25	< 0.4	619	0.0915619	2.53995
Gazawa	N 0403366, E 11633800	8.09	6.1	0.61	24	7	3	< 1	892	181	165	43	55.13	18.64	5.23	2.31	5.2	13.5	0.37	81	30	0.76	< 0.4	581	0.280579	2.95762
Gazawa	N0400793, E1165205	9.03	6.5	0.81	32	6	30	23	1221	155	167	19	67.61	14.3	4.74	0.91	4.9	7.5	0.31	118	104	0.91	1.24	416	0.331469	4.72797
Gazawa	N0400911, E1164210	10.88	6.8	0.75	30	8	18	7	1672	162	106	16	76.84	12.41	2.5	0.64	4.6	3	0.31	82	131	0.7	1.03	465	0.20145	6.19178
Gazawa	N0400476, E1165130	13.45	6.2	1.13	43	6	41	22	1748	238	132	18	64.98	14.75	2.52	0.58	5.2	12	0.49	150	119	1.08	0.97	577	0.170847	4.40542
Gazawa	N0400879, E1164600	9.19	5.2	0.47	19	5	17	7	743	115	84	17	40.42	10.43	2.34	0.8	7	39	< 0.20	84	80	0.52	< 0.4	471	0.224353	3.87536
Gazawa	N0400167, E1164707	9.56	5.1	0.53	21	6	13	3	674	136	109	17	35.25	11.85	2.92	0.77	7.2	42	< 0.20	78	35	0.41	0.43	599	0.246414	2.97468
Mokong	N397263, E1167679	8.12	6	0.84	34	5	7	< 1	967	149	118	19	59.54	15.29	3.73	1.02	5.4	15	< 0.20	73	78	0.51	0.8	391	0.24395	3.89405
Mokong	N397326, E 1166997	7.44	6.6	0.7	28	6	27	20	1035	131	120	15	69.56	14.67	4.14	0.88	4.8	6	0.24	67	39	0.76	1.35	350	0.282209	4.74165
Mokong	N397315, E1166619	15.93	5.6	1.5	50	6	6	< 1	1567	289	110	26	49.18	15.12	1.77	0.71	6.2	27	0.24	114	65	1.31	0.67	557	0.117063	3.25265
Gawel	N401609, E 1151052	18.02	6.7	1.28	46	6	11	3	2569	377	107	23	71.28	17.43	1.52	0.55	4.7	4.5	0.38	96	109	1.36	2.38	417	0.087206	4.0895
Gawel	N401404, E1149468	10.79	5.1	0.5	20	8	10	4	779	143	120	20	36.1	11.04	2.85	0.81	7.2	42	0.31	76	60	0.67	0.53	473	0.258152	3.26993
Gawel	N400698, E 1149558	15.97	5.5	0.73	29	5	4	< 1	1542	242	101	40	48.28	12.63	1.62	1.09	6.4	30	0.36	90	51	1.13	0.47	579	0.128266	3.82264
Guiring	N1174057, E431168	11.57	5.5	0.44	18	5	73	57	1103	180	101	20	47.67	12.96	2.24	0.75	6.4	30	0.42	128	46	0.92	1.07	435	0.17284	3.67824
Guiring	N1174001, E431387	11.67	5.4	0.51	20	5	91	82	1058	165	113	22	45.33	11.78	2.48	0.82	6.6	33	0.39	132	47	1.12	1.03	443	0.210526	3.84805
Guiring	N1173774, E430970	8.4	5.6	0.49	20	5	33	24	832	138	87	18	49.52	13.69	2.66	0.93	6.2	27	< 0.20	113	41	0.69	0.76	376	0.194302	3.61724
Guirvidig	N0479827, E1201097	19.41	6.8	0.99	40	6	12	12	2705	452	142	65	69.68	19.41	1.88	1.46	4.6	3	0.3	92	84	1.76	0.6	438	0.0968573	3.5899
Guirvidig	N0330463, E1025032	35.4	6	1.96	59	5	19	18	4004	862	308	43	56.55	20.29	2.23	0.53	5.4	15	0.42	172	45	2.83	0.93	697	0.109906	2.78709
Guirvidig	N0479206, E1201854	19	6.3	1.2	44	6	24	26	2270	455	272	45	59.74	19.96	3.67	1.03	5.1	10.5	0.2	107	76	1.59	0.99	407	0.183868	2.99299
Guirvidig	N0479055, E1201719	17.34	7.1	1.05	41	6	27	35	2480	379	113	171	71.51	18.21	1.67	4.29	4.3	0	0.4	144	130	1.75	0.6	426	0.0917079	3.92696
Guirvidig	N0479162, E1201529	34.86	5.9	1.86	57	4	13	12	3741	820	294	78	53.66	19.6	2.16	0.97	5.6	18	0.2	138	56	2.52	0.73	581	0.110204	2.73776
Guirvidig	N0479811, E1201374	10.44	6.9	0.68	27	4	12	12	1489	241	87	31	71.31	19.24	2.14	1.29	4.5	1.5	0.25	77	66	0.94	0.78	274	0.111227	3.70634
Guirvidig	N0483211, E1204656	27.98	6	1.4	48	4	17	21	3262	609	266	47	58.29	18.14	2.44	0.73	5.4	15	0.21	162	99	2.4	0.8	522	0.134509	3.21334
Guirvidig	N0483331, E1204597	18.5	6.6	1.12	42	7	38	49	2522	389	157	58	68.16	17.52	2.18	1.36	4.8	6	0.52	177	103	2.18	0.88	394	0.124429	3.89041
Guirvidig	N0483443, E1204504	19.98	6.7	1.2	44	8	28	31	2880	372	151	58	72.07	15.52	1.94	1.26	4.7	4.5	0.29	124	106	1.93	0.87	421	0.125	4.64369
Guirvidig	N0483790, E1204504	15.21	6.8	0.88	35	5	113	124	2082	336	249	48	68.44	18.41	4.2	1.37	4.6	3	0.41	132	62	1.5	2.82	382	0.228137	3.71754
Soukoungo	N0426482, E1195421	6.27	7	0.78	31	2	21	17	847	146	191	12	67.54	19.4	7.81	0.83	4.4	0	0.32	139	130	0.65	1.63	309	0.402577	3.48144
Soukoungo	N0426783, E1196138	19.17	7.5	1.01	40	2	7	3	2688	511	165	70	70.11	22.21	2.21	1.59	3.9	0	0.31	83	86	1.43	< 0.4	431	0.0995047	3.15669
Soukoungo	N0426549, E1195836	15.22	7.2	0.74	30	2	4	< 1	2081	398	169	98	68.36	21.79	2.85	2.8	4.2	0	< 0.20	76	88	1.31	< 0.4	510	0.130794	3.13722
Soukoungo	N0426389, E1195990	30.7	6.6	1.14	43	1	22	< 1	4251	638	200	69	69.23	17.32	1.67	0.98	4.8	6	< 0.20	103	92	1.77	< 0.4	651	0.0964203	3.99711
Soukoungo	N0426302, E1195685	18.2	6.2	1.07	41	6	33	< 1	2067	481	165	69	56.79	22.02	2.32	1.65	5.2	12	< 0.20	128	41	1.61	< 0.4	656	0.105359	2.57902
Salak	N0415227, E1156776	17	5.8	0.92	37	10	5	< 1	1767	313	157	138	51.97	15.34	2.37	3.53	5.8	21	0.42	91	85	0.96	0.47	625	0.154498	3.38787
Salak	N0415318, E1156638	21.63	6.7	1.13	43	6	6	< 1	2727	558	176	207	63.04	21.5	2.09	4.16	4.7	4.5	0.43	115	101	1.8	0.46	600	0.0972093	2.93209
Salak	N0414391, E1156553	12.68	6.5	0.77	31	6	8	3	1628	278	201	32	64.2	18.27	4.06	1.1	4.9	7.5	0.23	88	88	0.87	1.35	418	0.222222	3.51396
Salak	N0414440, E1156779	11.52	7.3	0.68	27	7	6	< 1	1662	255	173	38	72.14	18.45	3.85	1.43	4.1	0	0.28	73	87	0.85	0.45	503	0.208672	3.91003
Salak	N0414234, E1156161	6.3	6.7	0.26	10	4	7	2	884	122	82	17	70.16	16.14	3.34	1.17	4.7	4.5	< 0.20	70	51	0.53	< 0.4	259	0.206939	4.34696
Salak	N0414175, E1156119	12.46	6.7	0.79	32	5	33	28	1824	205	147	24	73.19	13.71	3.03	0.84	4.7	4.5	0.42	91	141	1.1	1.21	323	0.221007	5.33844
Salak	N0416016, E1156931	32.63	6.2	1.77	55	5	< 1	< 1	3642	936	241	89	55.81	23.9	1.89	1.19	5.2	12	0.27	155	41	2.49	0.6	825	0.0790795	2.33515
Salak	N0416189, E1156904	30.06	6.3	1.78	56	6	6	< 1	3510	819	267	71	58.38	22.7	2.28	1.03	5.1	10.5	< 0.20	117	58	2.25	0.51	785	0.100441	2.57181
Salak	N0415710, E1156846	14.91	6.5	0.93	37	6	6	< 1	1867	320	117	174	62.61	17.89	2.01	5.07	4.9	7.5	< 0.20	96	50	1.22	< 0.4	629	0.112353	3.49972
Salak	N0416854, E1156398	31.14	7.3	1.5	50	6	4	< 1	4098	1003	216	107	65.8	26.84	1.78	1.49	4.1	0	0.24	83	161	1.43	< 0.4	788	0.0663189	2.45156
Papata	N0425782, E1193148	16.77	6.8	1.3	46	4	12	9	2271	418	205	30	67.71	20.77	3.13	0.78	4.6	3	0.73	93	153	1.17	1.37	415	0.150698	3.25999
Papata	N0426104, E1193206	8.17	6.5	0.58	23	10	22	26	989	206	162	18	60.53	21.01	5.08	0.96	4.9	7.5	0.38	150	134	0.68	1.01	249	0.24179	2.88101
Papata	N0425989, E1193615	14.77	6.9	1.02	40	7	15	8	2036	349	126	109	68.92	19.69	2.19	3.21	4.5	1.5	0.52	98	165	1.27	0.61	361	0.111224	3.50025
Papata	N0408795, E1192818	21.56	5.7	0.85	34	7	5	< 1	2299	340	126	101	53.32	13.14	1.5	2.04	6	24	< 0.20	90	46	1.19	0.6	633	0.114155	4.05784
Papata	N0428480, E1191318	25.07	7.7	1.07	41	5	5	1	4021	436	90	39	80.2	14.49	0.92	0.68	3.7	0	0.27	90	191	1.92	< 0.4	566	0.0634921	5.53485
Dogba	N0426477, E1199425	24.15	6.5	1.1	42	9	5	< 1	3192	530	159	86	66.09	18.29	1.69	1.55	4.9	7.5	< 0.20	89	80	1.73	0.4	523	0.0924002	3.61345
Dogba	N0426425, E1199615	18.79	7.8	1.45	49	11	44	38	2404	523	600	46	63.97	23.19	8.19	1.06	3.6	0	0.36	107	128	1.82	0.84	472	0.353169	2.75852
Dogba	N0426681, E1199715	18.13	5.9	0.94	38	8	14	8	2058	369	126	38	56.76	16.96	1.78	0.91	5.6	18	0.21	123	92	1.42	0.74	403	0.104953	3.3467
Dogba	N0426871, E1199699	23.26	6.2	1.93	59	6	10	3	2943	480	130	49	63.26	17.2	1.43	0.92	5.2	12	0.24	174	101	1.55	1.52	578	0.0831395	3.67791
Dogba	N0425981, E1198713	8.98	7.2	0.62	25	8	120	116	1233	185	322	16	68.65	17.17	9.19	0.77	4.2	0	0.26	93	87	0.83	3.46	268	0.535236	3.99825
Dogba	N0424900, E1197366	11.64	6.7	0.73	29	5	12	< 1	1662	230	66	39	71.39	16.47	1.45	1.46	4.7	4.5	0.49	99	95	0.74	1.29	325	0.0880389	4.33455
Dogba	N0425253, E1193738	11.74	8.9	0.53	21	8	11	2	1195	273	68	695	50.89	19.38	1.49	25.74	2.5	0	0.23	54	104	0.87	< 0.4	272	0.0768834	2.6259
Dogba	N0423584, E1192773	21.52	8.6	0.89	36	7	16	17	2880	398	171	636	66.91	15.41	2.04	12.85	2.8	0	0.62	64	141	1.87	0.94	471	0.132382	4.34199
Yagoua	N0528382, E1141553	6.23	5.4	0.5	20	5	8	< 1	466	119	126	27	37.4	15.92	5.19	1.88	6.6	33	< 0.20	70	39	0.59	< 0.4	379	0.326005	2.34925
Yagoua	N0528539, E1141089	6.77	5.4	0.61	24	4	9	4	538	134	85	15	39.73	16.49	3.22	0.96	6.6	33	0.58	79	53	0.7	0.82	300	0.19527	2.40934
Yagoua	N0528497, E1140795	11.22	5.5	0.86	34	5	6	5	1003	208	128	13	44.7	15.45	2.93	0.5	6.4	30	< 0.20	71	70	0.5	0.5	349	0.189644	2.8932
Yagoua	N0528205, E1140536	3.8	5.4	0.43	17	4	4	< 1	291	72	72	13	38.29	15.79	4.86	1.49	6.6	33	< 0.20	71	29	0.52	< 0.4	265	0.30779	2.42495
Yagoua	N0527534, E1139046	7.96	7.3	0.66	26	5	112	107	1156	155	193	15	72.61	16.23	6.22	0.82	4.1	0	0.23	67	43	0.72	2.4	193	0.383241	4.47381
			Table 2S: Soil properties and GPS points of soil samples in the North region
Locality	GPS location	Total Exchange Capacity (meq/100 g)	pH	Organic Matter (%)	Estimated Nitrogen Release (# N/acre)	S* (ppm)	P* (mg/kg)	Bray II P (mg/kg)	Ca* (mg/kg)	Mg* (mg/kg)	K* (mg/kg)	Na* (mg/kg)	Ca** (%)	Mg** (%)	K** (%)	Na** (%)	Other Bases** (%)	H** (%)	B* (mg/kg)	Fe* (mg/kg)	Mn* (mg/kg)	Cu* (mg/kg)	Zn* (mg/kg)	Al* (mg/kg)	K/Mg	Ca/Mg
Sangueré Paul	N1025536, E330941	4.71	5.4	0.46	18	5	9	4	442	55	51	11	46.92	9.73	2.78	1.02	6.6	33	< 0.20	46	83	0.74	0.71	374	0.285714	4.8222
Sangueré Paul	N1025581, E331134	5.35	5	0.38	15	5	9	1	377	56	52	14	35.23	8.72	2.49	1.14	7.4	45	< 0.20	78	67	0.63	< 0.4	323	0.28555	4.04014
Sangueré Paul	N1025582, E331015	5.32	5	0.44	18	5	12	2	370	57	56	15	34.77	8.93	2.7	1.23	7.4	45	0.24	59	99	0.51	0.7	288	0.302352	3.89362
Sangueré Paul	N1025774, E331010	7.37	4.7	1.16	43	5	7	2	424	69	95	19	28.77	7.8	3.31	1.12	8	51	0.55	297	16	1.01	1.43	412	0.424359	3.68846
Sangueré Paul	N1025709, E330809	3.5	5.3	0.53	21	6	9	2	268	48	78	14	38.29	11.43	5.71	1.74	6.8	36	0.21	126	62	0.59	0.88	274	0.499563	3.34996
Bibol	N0326250, E1011212	2.75	5.3	0.53	21	6	7	< 1	221	33	51	14	40.18	10	4.76	2.21	6.8	36	< 0.20	71	27	0.69	< 0.4	519	0.476	4.018
Bibol	N0325430, E 1011077	4.02	5.4	0.49	20	6	8	< 1	364	53	44	12	45.27	10.99	2.81	1.3	6.6	33	< 0.20	48	103	0.44	0.48	317	0.255687	4.1192
Bibol	N0325208, E1011062	5.62	5.8	0.57	23	6	8	< 1	629	84	78	15	55.96	12.46	3.56	1.16	5.8	21	< 0.20	60	197	0.66	0.81	381	0.285714	4.49117
Bibol	N0324246, 1010844	12.04	5.2	1.04	41	6	4	< 1	963	150	107	37	39.99	10.38	2.28	1.34	7	39	0.41	203	77	1.6	0.59	560	0.219653	3.8526
Bibol	N0324237, E 1010777	7.38	7.5	1.02	40	6	10	3	1101	131	124	41	74.59	14.79	4.31	2.42	3.9	0	0.39	72	118	0.81	1.1	264	0.291413	5.04327
Bibol	N0324250, E 1010583	8.4	5.8	0.75	30	6	6	< 1	935	140	97	13	55.65	13.89	2.96	0.67	5.8	21	0.32	74	124	0.55	0.67	318	0.213103	4.00648
Bibol	N0324239, E1010335	5.95	6.1	0.57	23	4	10	3	754	107	50	11	63.36	14.99	2.15	0.8	5.2	13.5	0.27	70	140	0.49	0.49	291	0.143429	4.22682
Bibol	N0324627, E1012658	12.75	6	1.01	40	5	4	< 1	1647	190	86	26	64.59	12.42	1.73	0.89	5.4	15	0.21	90	157	1.03	< 0.4	415	0.139291	5.20048
Bibol	N0324889, E 1012484	11.15	5.1	1.08	42	5	5	< 1	853	120	103	31	38.25	8.97	2.37	1.21	7.2	42	0.39	178	49	1.76	0.53	613	0.264214	4.26421
Bibol	N0324246, E 1011936	5.96	5.1	0.61	24	6	12	3	451	70	52	13	37.84	9.79	2.24	0.95	7.2	42	0.23	59	177	0.87	0.93	343	0.228805	3.86517
Djalingo	N1024857, E332481	2.61	5.7	0.44	18	6	14	7	277	34	41	12	53.07	10.86	4.03	2	6	24	< 0.20	54	73	0.52	1.01	386	0.371087	4.88674
Djalingo	N1020394, 335167	2.08	5.8	0.38	15	5	9	2	217	34	38	13	52.16	13.62	4.68	2.72	5.8	21	< 0.20	60	118	0.6	0.97	250	0.343612	3.82966
Djalingo	N1022389, E333011	2.56	7.2	0.49	20	7	6	< 1	336	58	54	35	65.63	18.88	5.41	5.94	4.2	0	0.45	113	252	1.02	0.77	268	0.286547	3.47617
Djalingo	N1018045, E331121	5.41	4.9	0.57	23	6	5	< 1	350	63	51	12	32.35	9.7	2.42	0.96	7.6	47	0.26	47	67	0.53	< 0.4	435	0.249485	3.33505
Gouna	N0340205, E0942272	4.39	5.6	0.74	30	6	7	< 1	437	62	61	17	49.77	11.77	3.56	1.68	6.2	27	< 0.20	41	58	0.27	< 0.4	412	0.302464	4.22855
Gouna	N0334551, E0941539	5.97	5.6	1.12	42	6	4	< 1	636	73	43	20	53.27	10.19	1.85	1.46	6.2	27	0.34	224	45	2.27	0.63	434	0.181551	5.22767
Gouna	N0344437, E0941412	5.85	5.9	0.93	37	7	6	< 1	723	74	63	17	61.79	10.54	2.76	1.26	5.6	18	0.31	151	95	1.82	2.51	529	0.26186	5.86243
Gouna	N0345226, E0940760	5.36	5.4	0.57	23	5	6	< 1	485	74	53	14	45.24	11.5	2.54	1.14	6.6	33	0.24	63	72	0.72	< 0.4	397	0.22087	3.93391
Gouna	N0345132, E0940721	8.56	5.7	0.97	39	5	8	< 1	939	134	45	15	54.85	13.05	1.35	0.76	6	24	0.37	75	105	0.83	3.6	444	0.103448	4.20307
Gouna	N0338749, E0942823	4.54	6.3	0.7	28	6	7	< 1	588	73	54	33	64.76	13.4	3.05	3.16	5.1	10.5	0.24	74	234	0.62	0.75	415	0.227612	4.83284
Gouna	N0335765, E0948759	4.07	5.9	0.95	38	6	7	< 1	462	66	70	16	56.76	13.51	4.41	1.71	5.6	18	0.24	138	95	1.11	0.45	486	0.326425	4.20133
Gouna	N0336602, E0947585	8.46	5.8	1.21	44	6	5	< 1	959	118	63	58	56.68	11.62	1.91	2.98	5.8	21	0.23	177	60	1.35	0.48	426	0.164372	4.8778
Gouna	N0336180, E0947515	7.69	6.6	1.03	41	5	4	< 1	1041	156	66	43	67.69	16.91	2.2	2.43	4.8	6	0.27	146	56	2.21	0.71	330	0.130101	4.00296
Karewa	N0344536, E1014587	22.31	6.3	1.4	48	5	4	< 1	2601	623	116	78	58.29	23.27	1.33	1.52	5.1	10.5	0.22	96	80	1.81	0.71	579	0.0571551	2.50494
Karewa	N0344370, E1014799	19.42	7.1	1.27	45	3	10	1	2701	528	111	92	69.54	22.66	1.47	2.06	4.3	0	0.63	130	120	2.51	0.41	483	0.064872	3.06884
Karewa	N0344264, E1015537	35.08	6.7	1.85	57	3	7	< 1	4232	1140	183	166	60.32	27.08	1.34	2.06	4.7	4.5	0.8	148	148	2.79	< 0.4	698	0.049483	2.22747
Kismatari	N0332476 , E1030610	8.05	6.3	0.49	20	2	26	15	961	198	77	33	59.69	20.5	2.45	1.78	5.1	10.5	< 0.20	86	87	0.8	0.55	344	0.119512	2.91171
Kismatari	N0332306 , E1030540	3.76	7	0.51	20	3	21	16	511	97	60	17	67.95	21.5	4.09	1.97	4.4	0	0.28	91	87	1.74	5.36	231	0.190233	3.16047
Kismatari	N0332102, 1030944	10.37	6.5	0.89	36	2	77	74	1409	191	143	19	67.94	15.35	3.54	0.8	4.9	7.5	0.22	114	93	1.06	1.23	391	0.230619	4.42606
Kismatari	N0332097, E 1030777	19.14	5.5	1.32	46	2	17	3	1779	340	92	48	46.47	14.8	1.23	1.09	6.4	30	< 0.20	272	72	3.01	0.83	614	0.0831081	3.13986
Kismatari	N0332131, E1030468	6.99	7	0.71	28	5	111	93	1021	146	93	28	73.03	17.41	3.41	1.74	4.4	0	< 0.20	122	110	2.78	2.51	338	0.195864	4.19472
Bamé	N0340258, E1005634	5.54	5.1	0.6	24	2	14	< 1	422	51	83	15	38.09	7.67	3.84	1.18	7.2	42	0.21	145	53	0.77	0.59	339	0.500652	4.9661
Bamé	N0345187, E1005185	6.38	5.5	0.6	24	5	9	2	662	65	59	13	51.88	8.49	2.37	0.89	6.4	30	< 0.20	122	87	0.54	< 0.4	261	0.279152	6.11072
Bamé	N0344773, E1004752	3.39	5.8	0.43	17	2	8	< 1	393	43	45	10	57.96	10.57	3.4	1.28	5.8	21	< 0.20	59	63	0.34	< 0.4	213	0.321665	5.48344
Bamé	N0339708, E1006764	2.77	5.1	0.5	20	2	7	< 1	213	25	30	13	38.45	7.52	2.78	2.04	7.2	42	0.67	51	63	0.27	< 0.4	311	0.369681	5.11303
Bamé	N0338484, E1005328	5.7	5.5	0.52	21	2	8	< 1	604	53	48	10	52.98	7.75	2.16	0.76	6.4	30	0.42	73	109	0.43	< 0.4	202	0.27871	6.83613
Ngong	N0333295, E0995222	5.5	5.6	0.93	37	2	5	1	544	87	77	8	49.45	13.18	3.59	0.63	6.2	27	< 0.20	57	170	0.32	< 0.4	447	0.272382	3.7519
Ngong	N0333185, E0994085	7.15	6	0.72	29	3	2	< 1	890	112	103	11	62.24	13.05	3.69	0.67	5.4	15	< 0.20	154	107	0.66	< 0.4	250	0.282759	4.76935
Ngong	N0333958, E0995745	5.8	5.6	0.85	34	< 1	8	< 1	608	74	67	10	52.41	10.63	2.96	0.75	6.2	27	< 0.20	79	173	0.48	< 0.4	304	0.278457	4.93039
Ngong	N0334723, E0995328	4.1	5.4	0.53	21	< 1	5	1	370	50	68	8	45.12	10.16	4.25	0.85	6.6	33	< 0.20	52	158	0.32	0.51	292	0.418307	4.44094
Ngong	N0334693, E0995618	3.33	5.5	0.85	34	< 1	10	2	295	52	67	9	44.29	13.01	5.16	1.18	6.4	30	0.78	45	144	0.24	< 0.4	236	0.396618	3.4043
			Table 3S: Soil properties and GPS points of soil samples in the Centre region
Locality	GPS location	Total Exchange Capacity (meq/100 g)	pH	Organic Matter (%)	Estimated Nitrogen Release (# N/acre)	S* (ppm)	P* (mg/kg)	Bray II P (mg/kg)	Ca* (mg/kg)	Mg* (mg/kg)	K* (mg/kg)	Na* (mg/kg)	Ca** (%)	Mg** (%)	K** (%)	Na** (%)	Other Bases** (%)	H** (%)	B* (mg/kg)	Fe* (mg/kg)	Mn* (mg/kg)	Cu* (mg/kg)	Zn* (mg/kg)	Al* (mg/kg)	K/Mg	Ca/Mg
Nkolbisson	N427615,E773314	10.83	5.5	8.16	116	5	2	< 1	987	219	25	15	45.57	16.85	0.59	0.6	6.4	30	0.28	70	4	1.22	0.4	1223	0.0350148	2.70445
Nkolbisson	N427870,E773394	6.51	5.6	6.79	109	5	2	< 1	605	146	15	16	46.47	18.69	0.59	1.07	6.2	27	< 0.20	35	2	1.06	< 0.4	921	0.0315677	2.48636
Nkolbisson	N427870,E773095	10.14	6	8.13	116	4	2	< 1	1204	200	122	16	59.37	16.44	3.09	0.69	5.4	15	< 0.20	64	1	1.29	< 0.4	1101	0.187956	3.61131
Mbalmayo	N386513, E778705	8.66	4.5	2.62	72	12	7	< 1	404	101	93	16	23.33	9.72	2.75	0.8	8.4	55	< 0.20	108	111	1.62	0.79	725	0.282922	2.40021
Mbalmayo	N386439, E779240	6.69	4.5	2.21	64	7	3	< 1	351	64	36	16	26.23	7.97	1.38	1.04	8.4	55	< 0.20	120	137	1.77	0.78	671	0.173149	3.29109
Mbalmayo	N386778, E778323	4.72	5.1	2.59	72	7	5	< 1	335	58	67	16	35.49	10.24	3.64	1.47	7.2	42	< 0.20	118	159	1.51	1.04	632	0.355469	3.46582
Mbalmayo	N386970, E779239	10.94	4.7	3.48	85	7	2	< 1	654	109	101	11	29.89	8.3	2.37	0.44	8	51	< 0.20	81	110	1.58	1.28	663	0.285542	3.6012
Mbalmayo	N386625, E7779903	6.82	5.1	1.99	60	5	1	< 1	491	105	32	12	36	12.83	1.2	0.77	7.2	42	< 0.20	89	105	1.55	< 0.4	594	0.0935308	2.80592
Mbalmayo	N386481, E778954	10.54	4.7	3.66	87	10	6	< 1	675	93	50	10	32.02	7.35	1.22	0.41	8	51	< 0.20	113	138	2	1.76	721	0.165986	4.35646
Mbalmayo	N492005, E791271	7.56	4.8	2.18	64	6	< 1	< 1	481	87	37	9	31.81	9.59	1.25	0.52	7.8	49	< 0.20	135	234	1.7	0.78	529	0.130344	3.317
Mbalmayo	N386957, E779239	11.24	4.7	3.85	88	7	1	< 1	725	103	34	9	32.25	7.64	0.78	0.35	8	51	< 0.20	122	210	1.56	2.63	457	0.102094	4.2212
Mbalmayo	N386992, E779238	8.77	5.8	2.04	61	9	5	< 1	962	167	65	12	54.85	15.87	1.9	0.59	5.8	21	0.32	140	205	2.03	1.29	559	0.119723	3.45621
Mbalmayo	N386777, E778334	12.13	3.9	3.57	86	16	5	< 1	424	71	76	12	17.48	4.88	1.61	0.43	9.6	66	0.3	197	39	2	0.99	939	0.329918	3.58197
Mbalmayo	N386971, E779239	9.6	4.4	2.11	62	23	8	< 1	463	88	77	13	24.11	7.64	2.06	0.59	8.6	57	0.26	161	210	2.31	0.87	834	0.269634	3.15576
Mbalmayo	N386625, E777904	8.62	4.1	2.14	63	21	5	< 1	334	65	50	13	19.37	6.28	1.49	0.66	9.2	63	0.25	113	139	2.37	0.41	831	0.237261	3.08439
Mbalmayo	N386514, E778953	9.18	4.4	2.15	63	14	7	< 1	426	100	52	14	23.2	9.08	1.45	0.66	8.6	57	0.24	100	75	1.88	0.6	760	0.159692	2.55507
Mbalmayo	N386492, E778953	12.77	5.1	2.67	73	7	5	< 1	1029	139	46	15	40.29	9.07	0.92	0.51	7.2	42	0.33	93	113	1.92	1.29	604	0.101433	4.44212
Mbalmayo	N492007, E791278	6.36	4.4	2.32	66	17	6	< 1	280	62	85	12	22.01	8.12	3.43	0.82	8.6	57	< 0.20	120	93	1.79	0.47	848	0.422414	2.71059
			Table 4S: Soil properties and GPS points of soil samples in the Adamawa region
Locality	GPS location	Total Exchange Capacity (meq/100 g)	pH	Organic Matter (%)	Estimated Nitrogen Release (# N/acre)	S* (ppm)	P* (mg/kg)	Bray II P (mg/kg)	Ca* (mg/kg)	Mg* (mg/kg)	K* (mg/kg)	Na* (mg/kg)	Ca** (%)	Mg** (%)	K** (%)	Na** (%)	Other Bases** (%)	H** (%)	B* (mg/kg)	Fe* (mg/kg)	Mn* (mg/kg)	Cu* (mg/kg)	Zn* (mg/kg)	Al* (mg/kg)	K/Mg	Ca/Mg
Wassande		6.04	4.4	15.18	128	11	3	< 1	287	44	82	15	23.76	6.07	3.48	1.08	8.6	57	0.31	49	9	1.69	< 0.4	1143	0.573311	3.91433
Wassande		4.16	4.3	14.87	127	29	3	< 1	184	28	51	13	22.12	5.61	3.14	1.36	8.8	59	0.25	40	4	1.48	< 0.4	1070	0.559715	3.94296
Wassande		5.23	4.4	15.98	128	15	5	< 1	269	30	49	18	25.72	4.78	2.4	1.5	8.6	57	< 0.20	56	2	1.5	< 0.4	1176	0.502092	5.38075
Wassande		5.79	4.4	15.68	128	8	2	< 1	284	47	47	14	24.53	6.76	2.08	1.05	8.6	57	< 0.20	52	6	1.53	< 0.4	1142	0.307692	3.6287
Wassande		5.54	4.3	15.65	128	10	3	< 1	247	41	55	15	22.29	6.17	2.55	1.18	8.8	59	0.24	62	5	2.02	< 0.4	1223	0.41329	3.61264
Wassande		13.27	4.2	15.17	128	8	7	< 1	624	75	62	18	23.51	4.71	1.2	0.59	9	61	< 0.20	64	5	1.9	< 0.4	1173	0.254777	4.99151
Wassande		8.99	4.4	16.29	128	9	4	< 1	550	23	42	10	30.59	2.13	1.2	0.48	8.6	57	< 0.20	58	3	1.64	< 0.4	1149	0.56338	14.3615
Wassande		3.94	4.3	6.61	108	3	4	< 1	135	36	99	9	17.13	7.61	6.44	0.99	8.8	59	< 0.20	42	37	0.98	< 0.4	1302	0.846255	2.25099
Wassande		3.84	4.6	13.87	127	< 1	1	< 1	239	16	46	10	31.12	3.47	3.07	1.13	8.2	53	0.71	40	7	1.44	< 0.4	1198	0.884726	8.9683
Bellel		13.56	4.7	7.17	111	12	6	< 1	797	119	202	15	29.39	7.31	3.82	0.48	8	51	< 0.20	59	32	1.47	< 0.4	1394	0.522572	4.02052
Bellel		9.01	4.8	7.04	110	12	4	< 1	438	129	220	15	24.31	11.93	6.26	0.72	7.8	49	0.23	54	35	1.39	< 0.4	1203	0.524728	2.03772
Bellel		11.64	4.4	6.1	106	9	3	< 1	557	120	62	14	23.93	8.59	1.37	0.52	8.6	57	0.23	49	38	1.04	< 0.4	1160	0.159488	2.7858
Bellel		11.06	4.5	5.69	103	6	3	< 1	560	131	39	13	25.32	9.87	0.9	0.51	8.4	55	< 0.20	46	36	1.16	< 0.4	1227	0.0911854	2.56535
Bellel		8.06	4.4	7.01	110	9	3	< 1	397	72	48	15	24.63	7.44	1.53	0.81	8.6	57	< 0.20	69	12	1.22	< 0.4	1303	0.205645	3.31048
Mbe		4.7	6	1.22	44	< 1	3	< 1	572	79	74	8	60.85	14.01	4.04	0.74	5.4	15	0.45	92	140	1.82	0.56	635	0.288365	4.34333
Mbe		11.84	5.7	2.08	62	1	6	2	1216	239	59	15	51.35	16.82	1.28	0.55	6	24	< 0.20	234	111	2.07	1.31	474	0.0760999	3.05291
Mbe		4.17	5	0.6	24	2	3	< 1	294	50	23	9	35.25	9.99	1.41	0.94	7.4	45	< 0.20	124	61	0.53	< 0.4	399	0.141141	3.52853
Mbe		3.85	5.8	1.64	53	< 1	5	< 1	448	57	26	8	58.18	12.34	1.73	0.9	5.8	21	< 0.20	90	120	1.45	< 0.4	544	0.140194	4.71475
Mbe		5.32	5.6	1.12	42	2	7	< 1	555	71	59	8	52.16	11.12	2.84	0.65	6.2	27	< 0.20	82	99	1.38	< 0.4	429	0.255396	4.69065
Meiganga		4.94	5.5	2.19	64	< 1	14	5	421	93	87	9	42.61	15.69	4.52	0.79	6.4	30	< 0.20	102	38	0.68	0.97	851	0.288082	2.71574
Meiganga		4.48	4.7	1.84	57	7	4	< 1	244	41	91	10	27.23	7.63	5.21	0.97	8	51	< 0.20	82	15	0.66	< 0.4	1055	0.682831	3.56881
Meiganga		3.53	5.4	2.54	71	3	2	< 1	275	52	107	11	38.95	12.28	7.77	1.35	6.6	33	< 0.20	93	32	0.45	< 0.4	1038	0.632736	3.17182
Ngangasao		17.52	4.9	7.91	115	2	7	14	1063	292	56	14	30.34	13.89	0.82	0.35	7.6	47	0.43	93	40	1.99	0.66	1063	0.0590353	2.18431
Ngangasao		8.75	4.5	6.35	107	6	< 1	< 1	448	92	59	10	25.6	8.76	1.73	0.5	8.4	55	0.22	52	15	0.96	< 0.4	1224	0.197489	2.92237
Ngangasao		9.89	4.8	6.59	108	3	1	< 1	508	162	128	12	25.68	13.65	3.32	0.53	7.8	49	< 0.20	45	22	1.31	< 0.4	1076	0.243223	1.88132
Ngangasao		6.04	4.5	6.2	106	8	< 1	< 1	252	84	76	13	20.86	11.59	3.23	0.94	8.4	55	< 0.20	45	12	0.95	< 0.4	1121	0.278689	1.79983
Ngangasao		7.13	4.6	5.89	104	5	1	< 1	365	86	67	12	25.6	10.05	2.41	0.73	8.2	53	< 0.20	35	32	0.37	< 0.4	1234	0.239801	2.54726
Wakwa		7.42	4.3	6.55	108	14	4	< 1	324	66	52	20	21.83	7.41	1.8	1.17	8.8	59	< 0.20	77	18	0.98	< 0.4	1433	0.242915	2.94602
Wakwa		15.72	4.2	5.39	102	26	8	< 1	813	49	68	16	25.86	2.6	1.11	0.44	9	61	< 0.20	52	20	0.83	< 0.4	1446	0.426923	9.94615
Wakwa		5.81	5.1	0.62	25	4	8	< 1	479	46	44	14	41.22	6.6	1.94	1.05	7.2	42	< 0.20	72	122	0.93	0.77	435	0.293939	6.24545
Wakwa		26.54	6	12.3	126	5	24	92	3129	480	543	20	58.95	15.07	5.25	0.33	5.4	15	0.54	94	12	1.73	1.1	1315	0.348374	3.91175
Wakwa		11.36	4.7	6.21	106	8	6	< 1	784	65	48	17	34.51	4.77	1.08	0.65	8	51	< 0.20	57	23	0.76	< 0.4	1486	0.226415	7.2348
			Table 5S: Soil properties and GPS points of soil samples in the West region
Locality		Total Exchange Capacity (meq/100 g)	pH	Organic Matter (%)	Estimated Nitrogen Release (# N/acre)	S* (ppm)	P* (mg/kg)	Bray II P (mg/kg)	Ca* (mg/kg)	Mg* (mg/kg)	K* (mg/kg)	Na* (mg/kg)	Ca** (%)	Mg** (%)	K** (%)	Na** (%)	Other Bases** (%)	H** (%)	B* (mg/kg)	Fe* (mg/kg)	Mn* (mg/kg)	Cu* (mg/kg)	Zn* (mg/kg)	Al* (mg/kg)	K/Mg	Ca/Mg
Mangoum		5.12	4.8	0.41	16	7	12	< 1	312	53	51	18	30.47	8.63	2.55	1.53	7.8	49	0.2	49	53	0.78	0.48	340	0.295481	3.53071
Mangoum		4.53	5.2	0.91	36	6	7	< 1	352	56	51	20	38.85	10.3	2.89	1.92	7	39	0.43	293	29	1.42	0.7	370	0.280583	3.77184
Mangoum		2.66	6.2	0.4	16	5	8	< 1	330	48	35	14	62.03	15.04	3.37	2.29	5.2	12	< 0.20	54	127	0.62	0.55	260	0.224069	4.12434
Mangoum		2.46	6	0.36	14	6	9	< 1	277	48	41	16	56.3	16.26	4.27	2.83	5.4	15	< 0.20	50	113	0.44	0.42	277	0.262608	3.46248
Mangoum		2.92	5.8	0.56	22	7	8	< 1	308	49	43	18	52.74	13.98	3.78	2.68	5.8	21	< 0.20	47	103	0.55	0.74	360	0.270386	3.77253
